# Supplementary material
Source: Springer Nature journal article supplement (https://www.springerprofessional.de/resource/supplementary/13638_2011_154_MOESM6_ESM.pdf/11897168)

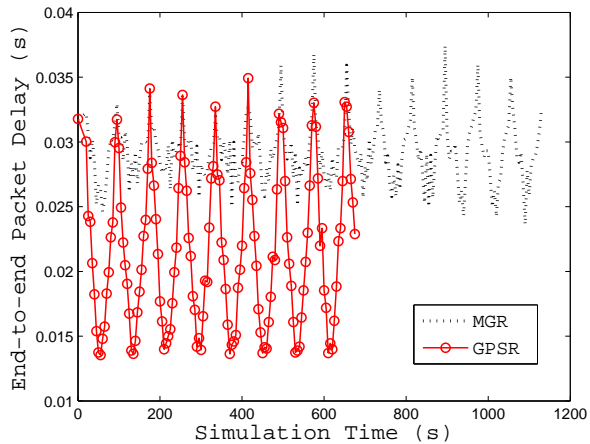

(a) End-to-end Packet Delay

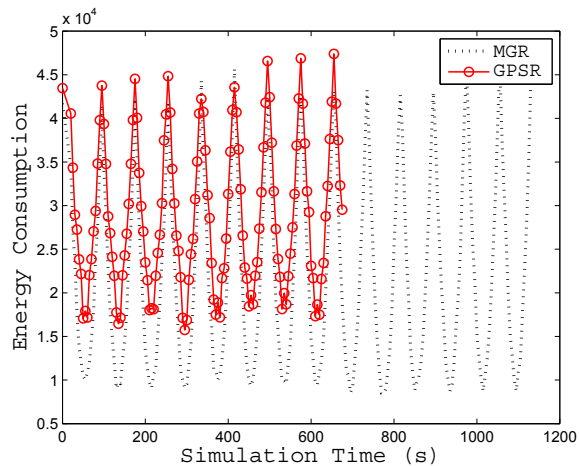

(b) Energy Consumption

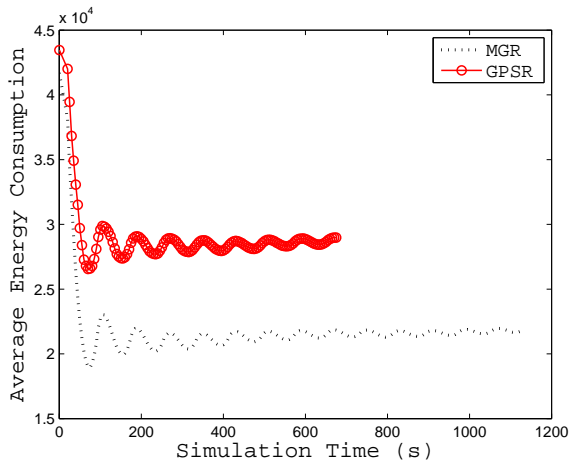

(c) Average Energy Consumption

Supplement: MOESM6 [file 11897168]
